# Supplementary material for: A new measure for functional similarity of gene products based on Gene Ontology
Source: Springer Nature journal article supplement (doi:10.1186/1471-2105-7-302), 2006-06-15
Supplement: Additional file 1 [file 1471-2105-7-302-s1.pdf]

# **Supplemental Data**

## **A new Measure for functional Similarity of Gene Products based on Gene Ontology**

Andreas Schlicker<sup>1\*</sup>, Francisco S. Domingues<sup>1</sup> , Jörg Rahnenführer<sup>1</sup> , Thomas Lengauer<sup>1</sup>

<sup>1</sup>Department of Computational Biology and Applied Algorithmics, Max-Planck-Institute for Informatics, Stuhlsatzenhausweg 85, 66123 Saarbrücken, Germany

Email: Andreas Schlicker\* - andreas.schlicker@mpi-inf.mpg.de; Francisco S. Domingues - doming@mpi-inf.mpg.de; Jörg Rahnenführer - rahnenfj@mpi-inf.mpg.de; Thomas Lengauer - lengauer@mpi-inf.mpg.de;

\*Corresponding author

## Supplement

### Comparing biological processes and molecular functions

Table S1: The 50 biological processes from fungi with lowest  $sim_{Rel}$  values compared to mammalian processes.

| acc        | name                                                                           | $sim_{Rel}$ | acc        |
|------------|--------------------------------------------------------------------------------|-------------|------------|
| GO:0030541 | plasmid partitioning                                                           | 0.15808     | GO:0006278 |
| GO:0006033 | chitin localization                                                            | 0.30027     | GO:0015986 |
| GO:0046713 | boron transport                                                                | 0.31932     | GO:0015986 |
| GO:0009302 | snoRNA transcription                                                           | 0.38639     | GO:0006367 |
| GO:0006089 | lactate metabolism                                                             | 0.38782     | GO:0009082 |
| GO:0019630 | quininate metabolism                                                           | 0.39903     | GO:0009082 |
| GO:0019541 | propionate metabolism                                                          | 0.42775     | GO:0009082 |
| GO:0042128 | nitrate assimilation                                                           | 0.4502      | GO:0009082 |
| GO:0009305 | protein amino acid biotinylation                                               | 0.4587      | GO:0006470 |
| GO:0016926 | protein desumoylation                                                          | 0.47222     | GO:0006470 |
| GO:0031144 | proteasome localization                                                        | 0.4916      | GO:0006614 |
| GO:0045116 | protein neddylation                                                            | 0.49535     | GO:0006470 |
| GO:0000338 | protein deneddylation                                                          | 0.51801     | GO:0006470 |
| GO:0006279 | premeiotic DNA synthesis                                                       | 0.52348     | GO:0006278 |
| GO:0006522 | alanine metabolism                                                             | 0.53138     | GO:0009082 |
| GO:0019985 | bypass DNA synthesis                                                           | 0.53997     | GO:0006303 |
| GO:0048309 | endoplasmic reticulum inheritance                                              | 0.54037     | GO:0006364 |
| GO:0015847 | putrescine transport                                                           | 0.55201     | GO:0015813 |
| GO:0031291 | Ran protein signal transduction                                                | 0.55494     | GO:0046580 |
| GO:0015801 | aromatic amino acid transport                                                  | 0.55565     | GO:0015813 |
| GO:0042762 | regulation of sulfur metabolism                                                | 0.55802     | GO:0009086 |
| GO:0045458 | recombination within rDNA repeats                                              | 0.55879     | GO:0006313 |
| GO:0018298 | protein-chromophore linkage                                                    | 0.56308     | GO:0006470 |
| GO:0000256 | allantoin catabolism                                                           | 0.56748     | GO:0006783 |
| GO:0040031 | snRNA modification                                                             | 0.58001     | GO:0006437 |
| GO:0042545 | cell wall modification                                                         | 0.58265     | GO:0006364 |
| GO:0000373 | Group II intron splicing                                                       | 0.58438     | GO:0006388 |
| GO:0000358 | formation of catalytic U2-type spliceosome for second transesterification step | 0.58438     | GO:0006388 |

Table S1: The 50 biological processes from fungi with lowest  $sim_{Rel}$  values compared to mammalian processes.

| acc        | name                                                                       | $sim_{Rel}$ | acc        |
|------------|----------------------------------------------------------------------------|-------------|------------|
| GO:0000396 | U2-type spliceosome conformational change to release U4 and U1             | 0.58438     | GO:0006388 |
| GO:0046459 | short-chain fatty acid metabolism                                          | 0.58763     | GO:0006636 |
| GO:0001718 | conversion of met-tRNA <sup>f</sup> to fmet-tRNA                           | 0.58925     | GO:0006437 |
| GO:0007116 | regulation of cell budding                                                 | 0.58973     | GO:0008356 |
| GO:0030582 | fruiting body formation                                                    | 0.59246     | GO:0007309 |
| GO:0030994 | primary cell septum hydrolysis                                             | 0.59514     | GO:0000921 |
| GO:0030995 | cell septum edging hydrolysis                                              | 0.59514     | GO:0000921 |
| GO:0006425 | glutaminyl-tRNA aminoacylation                                             | 0.59627     | GO:0006437 |
| GO:0043007 | rDNA maintenance                                                           | 0.60271     | GO:0007076 |
| GO:0015729 | oxaloacetate transport                                                     | 0.60369     | GO:0015744 |
| GO:0015741 | fumarate transport                                                         | 0.60369     | GO:0015744 |
| GO:0006513 | protein monoubiquitination                                                 | 0.60451     | GO:0000209 |
| GO:0000356 | U2-type catalytic spliceosome formation for first transesterification step | 0.61587     | GO:0006388 |
| GO:0017062 | cytochrome bc(1) complex assembly                                          | 0.61894     | GO:0008535 |
| GO:0000372 | Group I intron splicing                                                    | 0.62573     | GO:0006388 |
| GO:0046482 | para-aminobenzoic acid metabolism                                          | 0.62785     | GO:0046653 |
| GO:0006315 | homing of group II introns                                                 | 0.62954     | GO:0006313 |
| GO:0006322 | Ty3 element transposition                                                  | 0.62954     | GO:0006313 |
| GO:0006320 | Ty1 element transposition                                                  | 0.62954     | GO:0006313 |
| GO:0006316 | movement of group I intron                                                 | 0.62954     | GO:0006313 |
| GO:0031321 | prospore formation                                                         | 0.63094     | GO:0007595 |
| GO:0015772 | oligosaccharide transport                                                  | 0.63182     | GO:0009401 |

Table S2: The molecular functions from *Mycobacterium* with lowest  $sim_{Rel}$  values compared to mammalian functions.

| acc        | name                                                                                                                 | $sim_{Rel}$ | acc        |
|------------|----------------------------------------------------------------------------------------------------------------------|-------------|------------|
| GO:0008686 | 3&4-dihydroxy-2-butanone-4-phosphate synthase activity                                                               | 0.05293     | GO:0003968 |
| GO:0018786 | haloalkane dehalogenase activity                                                                                     | 0.13931     | GO:0046961 |
| GO:0004125 | L-seryl-tRNA <sup>Sec</sup> selenium transferase activity                                                            | 0.18767     | GO:0003968 |
| GO:0043365 | [formate-C-acetyltransferase]-activating enzyme                                                                      | 0.30076     | GO:0008137 |
| GO:0008862 | formate acetyltransferase activating enzyme activity                                                                 | 0.3383      | GO:0008137 |
| GO:0016216 | isopenicillin-N synthase activity                                                                                    | 0.35215     | GO:0008137 |
| GO:0004475 | mannose-1-phosphate guanylyltransferase activity                                                                     | 0.3757      | GO:0003968 |
| GO:0008773 | [protein-PII] uridylyltransferase activity                                                                           | 0.39112     | GO:0003968 |
| GO:0003919 | FMN adenylyltransferase activity                                                                                     | 0.39503     | GO:0003968 |
| GO:0050348 | trehalose O-mycolytransferase activity                                                                               | 0.40932     | GO:0004316 |
| GO:0004654 | polyribonucleotide nucleotidyltransferase activity                                                                   | 0.4118      | GO:0003968 |
| GO:0047330 | polyphosphate-glucose phosphotransferase activity                                                                    | 0.4182      | GO:0000155 |
| GO:0016210 | naringenin-chalcone synthase activity                                                                                | 0.4216      | GO:0004316 |
| GO:0030401 | transcription antiterminator activity                                                                                | 0.42698     | GO:0000156 |
| GO:0008910 | kanamycin kinase activity                                                                                            | 0.42998     | GO:0000155 |
| GO:0008928 | mannose-1-phosphate guanylyltransferase (GDP) activity                                                               | 0.43487     | GO:0003968 |
| GO:0008879 | glucose-1-phosphate thymidyltransferase activity                                                                     | 0.43877     | GO:0003968 |
| GO:0008710 | 8-amino-7-oxononanoate synthase activity                                                                             | 0.46909     | GO:0004316 |
| GO:0016852 | sirohydrochlorin cobaltochelate activity                                                                             | 0.48446     | GO:0004730 |
| GO:0008968 | phosphoheptose isomerase activity                                                                                    | 0.51468     | GO:0003918 |
| GO:0008887 | glycerate kinase activity                                                                                            | 0.52137     | GO:0000155 |
| GO:0016851 | magnesium chelatase activity                                                                                         | 0.52842     | GO:0004842 |
| GO:0004063 | aryldialkylphosphatase activity                                                                                      | 0.52996     | GO:0008967 |
| GO:0000036 | acyl carrier activity                                                                                                | 0.53992     | GO:0046961 |
| GO:0046025 | precorrin-6Y C5&15-methyltransferase (decarboxylating) activity                                                      | 0.55599     | GO:0008898 |
| GO:0046026 | precorrin-4 C11-methyltransferase activity                                                                           | 0.56021     | GO:0008898 |
| GO:0008832 | dGTPase activity                                                                                                     | 0.57983     | GO:0008967 |
| GO:0008691 | 3-hydroxybutyryl-CoA dehydrogenase activity                                                                          | 0.58093     | GO:0004616 |
| GO:0045156 | electron transporter& transferring electrons within the cyclic electron transport pathway of photosynthesis activity | 0.58192     | GO:0008137 |
| GO:0008949 | oxalyl-CoA decarboxylase activity                                                                                    | 0.5918      | GO:0004638 |
| GO:0008762 | UDP-N-acetylmuramate dehydrogenase activity                                                                          | 0.59661     | GO:0004616 |
| GO:0008999 | ribosomal-protein-alanine N-acetyltransferase activity                                                               | 0.59692     | GO:0004742 |
| GO:0008825 | cyclopropane-fatty-acyl-phospholipid synthase activity                                                               | 0.59789     | GO:0008898 |
| GO:0004190 | aspartic-type endopeptidase activity                                                                                 | 0.60033     | GO:0004194 |
| GO:0008945 | oligopeptidase B activity                                                                                            | 0.6088      | GO:0004263 |
| GO:0008810 | cellulase activity                                                                                                   | 0.61968     | GO:0004308 |
| GO:0008124 | 4-alpha-hydroxytetrahydrobiopterin dehydratase activity                                                              | 0.6278      | GO:0004730 |
| GO:0008677 | 2-dehydropantoate 2-reductase activity                                                                               | 0.6295      | GO:0004616 |
| GO:0008767 | UDP-galactopyranose mutase activity                                                                                  | 0.63708     | GO:0004619 |
| GO:0004401 | histidinol-phosphatase activity                                                                                      | 0.63717     | GO:0008967 |
| GO:0004412 | homoserine dehydrogenase activity                                                                                    | 0.6411      | GO:0004616 |
| GO:0016993 | precorrin-8X methylmutase activity                                                                                   | 0.64821     | GO:0004619 |
| GO:0004015 | adenosylmethionine-8-amino-7-oxononanoate transaminase activity                                                      | 0.6486      | GO:0004084 |
| GO:0042286 | glutamate-1-semialdehyde 2&1-aminomutase activity                                                                    | 0.65019     | GO:0004619 |
| GO:0004764 | shikimate 5-dehydrogenase activity                                                                                   | 0.65187     | GO:0004616 |
| GO:0008703 | 5-amino-6-(5-phosphoribosylamino)uracil reductase activity                                                           | 0.65523     | GO:0004616 |
| GO:0050525 | cutinase activity                                                                                                    | 0.65685     | GO:0004806 |

Table S2: The molecular functions from *Mycobacterium* with lowest  $sim_{Rel}$  values compared to mammalian functions.

| acc        | name                                                                           | $sim_{Rel}$ | acc        |
|------------|--------------------------------------------------------------------------------|-------------|------------|
| GO:0008909 | isochorismate synthase activity                                                | 0.65839     | GO:0004619 |
| GO:0047575 | 4-carboxymuconolactone decarboxylase activity                                  | 0.66286     | GO:0004638 |
| GO:0003961 | O-acetylhomoserine aminocarboxypropyltransferase activity                      | 0.66414     | GO:0004156 |
| GO:0018492 | carbon-monoxide dehydrogenase (acceptor) activity                              | 0.66437     | GO:0004365 |
| GO:0008806 | carboxymethylenebutenolidase activity                                          | 0.66481     | GO:0004806 |
| GO:0004160 | dihydroxy-acid dehydratase activity                                            | 0.67188     | GO:0004730 |
| GO:0017168 | 5-oxoprolinase (ATP-hydrolyzing) activity                                      | 0.67685     | GO:0050480 |
| GO:0008939 | nicotinate-nucleotide-dimethylbenzimidazole phosphoribosyltransferase activity | 0.67886     | GO:0004731 |
| GO:0008683 | 2-oxoglutarate decarboxylase activity                                          | 0.68297     | GO:0004638 |
| GO:0048307 | ferredoxin-nitrite reductase activity                                          | 0.68665     | GO:0004846 |
| GO:0005351 | sugar porter activity                                                          | 0.68778     | GO:0015520 |
| GO:0003861 | 3-isopropylmalate dehydratase activity                                         | 0.69434     | GO:0004730 |
| GO:0008774 | acetaldehyde dehydrogenase (acetylating) activity                              | 0.69537     | GO:0004365 |
| GO:0004124 | cysteine synthase activity                                                     | 0.69717     | GO:0004730 |
| GO:0004106 | chorismate mutase activity                                                     | 0.69748     | GO:0004619 |
| GO:0004748 | ribonucleoside-diphosphate reductase activity                                  | 0.69767     | GO:0051061 |

## Comparison of *funSim* and sequence similarity

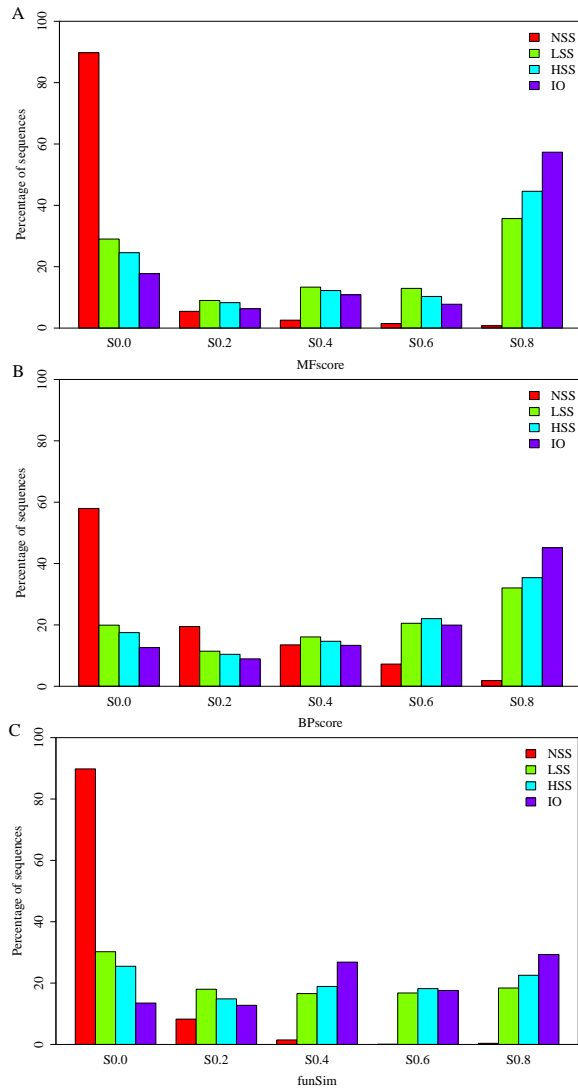

Figure S1 - Distribution of the *MFscore* (A), *BPscore* (B), *funSim* score (C) for different sets of protein pairs. The bins correspond to the following intervals of *funSim* values: S0.0: [0.0, 0.2[; S0.2: [0.2, 0.4[; S0.4: [0.4, 0.6[; S0.6: [0.6, 0.8[; S0.8: [0.8, 1.0]. The percentage values are calculated according to the total number of protein pairs in the different categories. The sets of the different categories contain the following numbers of protein pairs: NSS 1356, LSS and HSS 989 each, and IO 682. The derivation of the sets is explained in the Materials and Methods section.
